# Supplementary material
Source: Springer Nature journal article supplement (https://www.springermedizin.de/resource/supplementary/12958_2013_1162_MOESM1_ESM.pdf/9566678)

### Three Box Plots

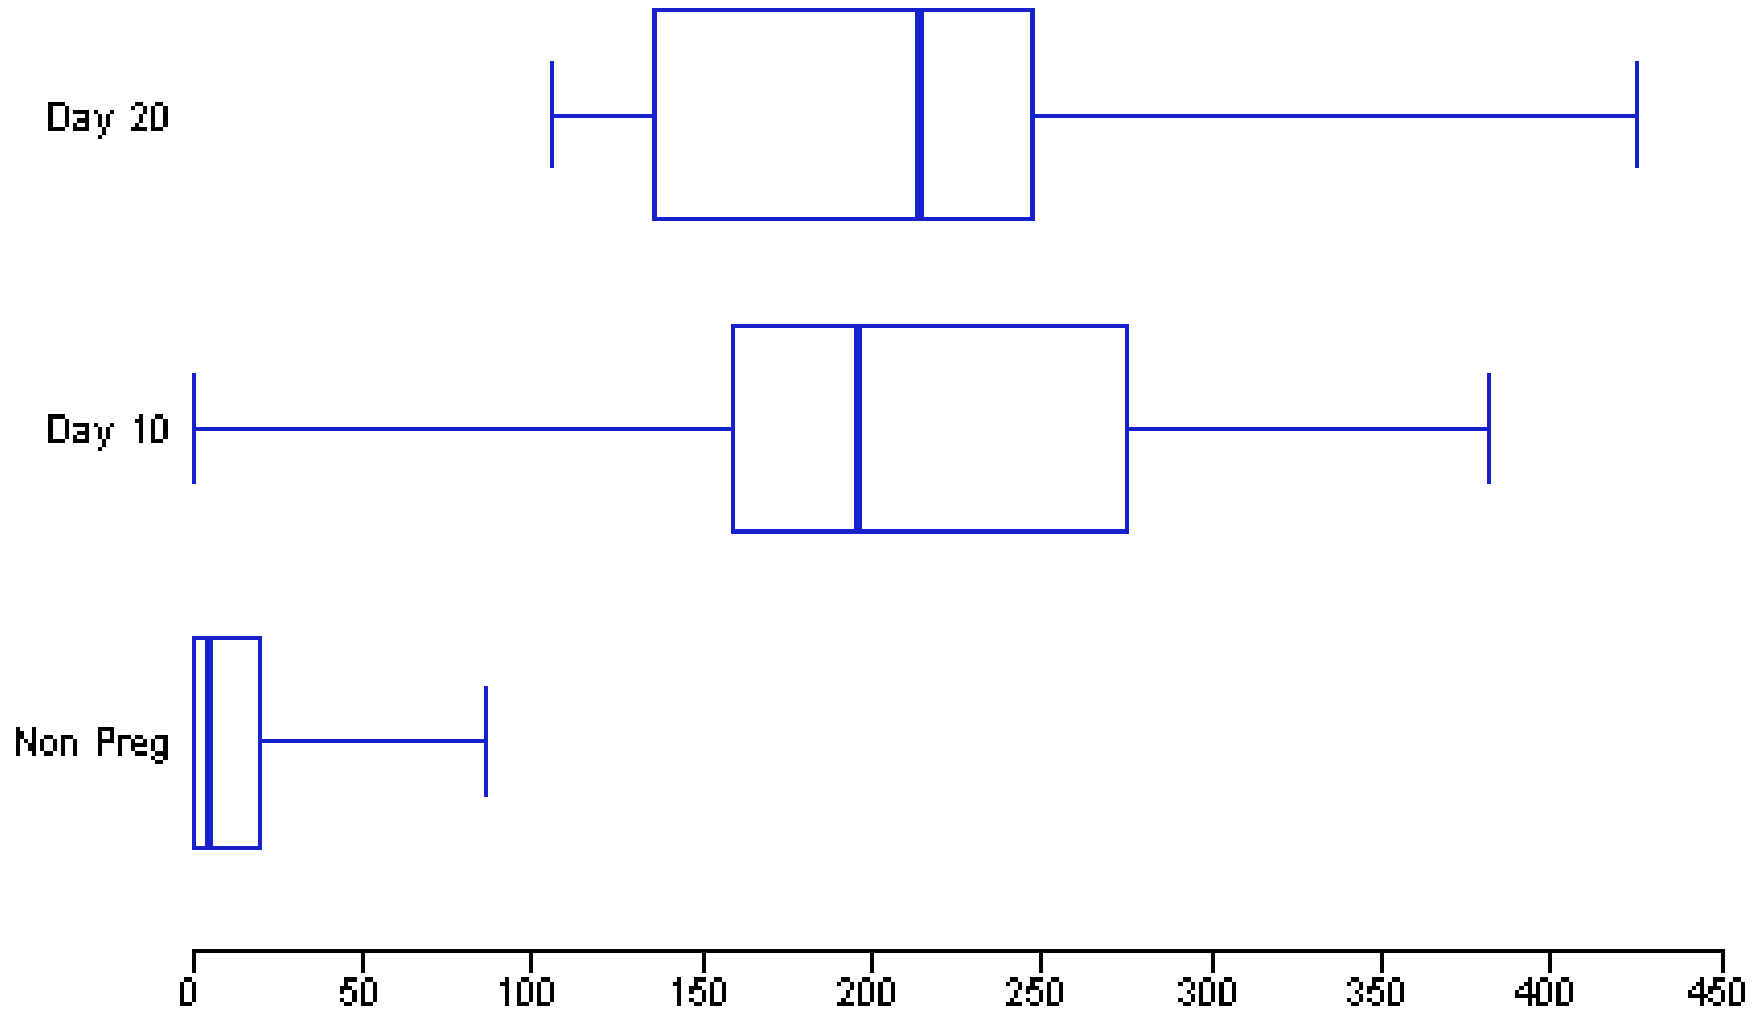

Supplement: MOESM1 [file 9566678]
